# Supplementary material for: Cuproptosis related genes associated with Jab1 shapes tumor microenvironment and pharmacological profile in nasopharyngeal carcinoma
Source: PubMed Central journal article supplement (PMC9816571; doi:10.3389/fimmu.2022.989286), 2022-12-23

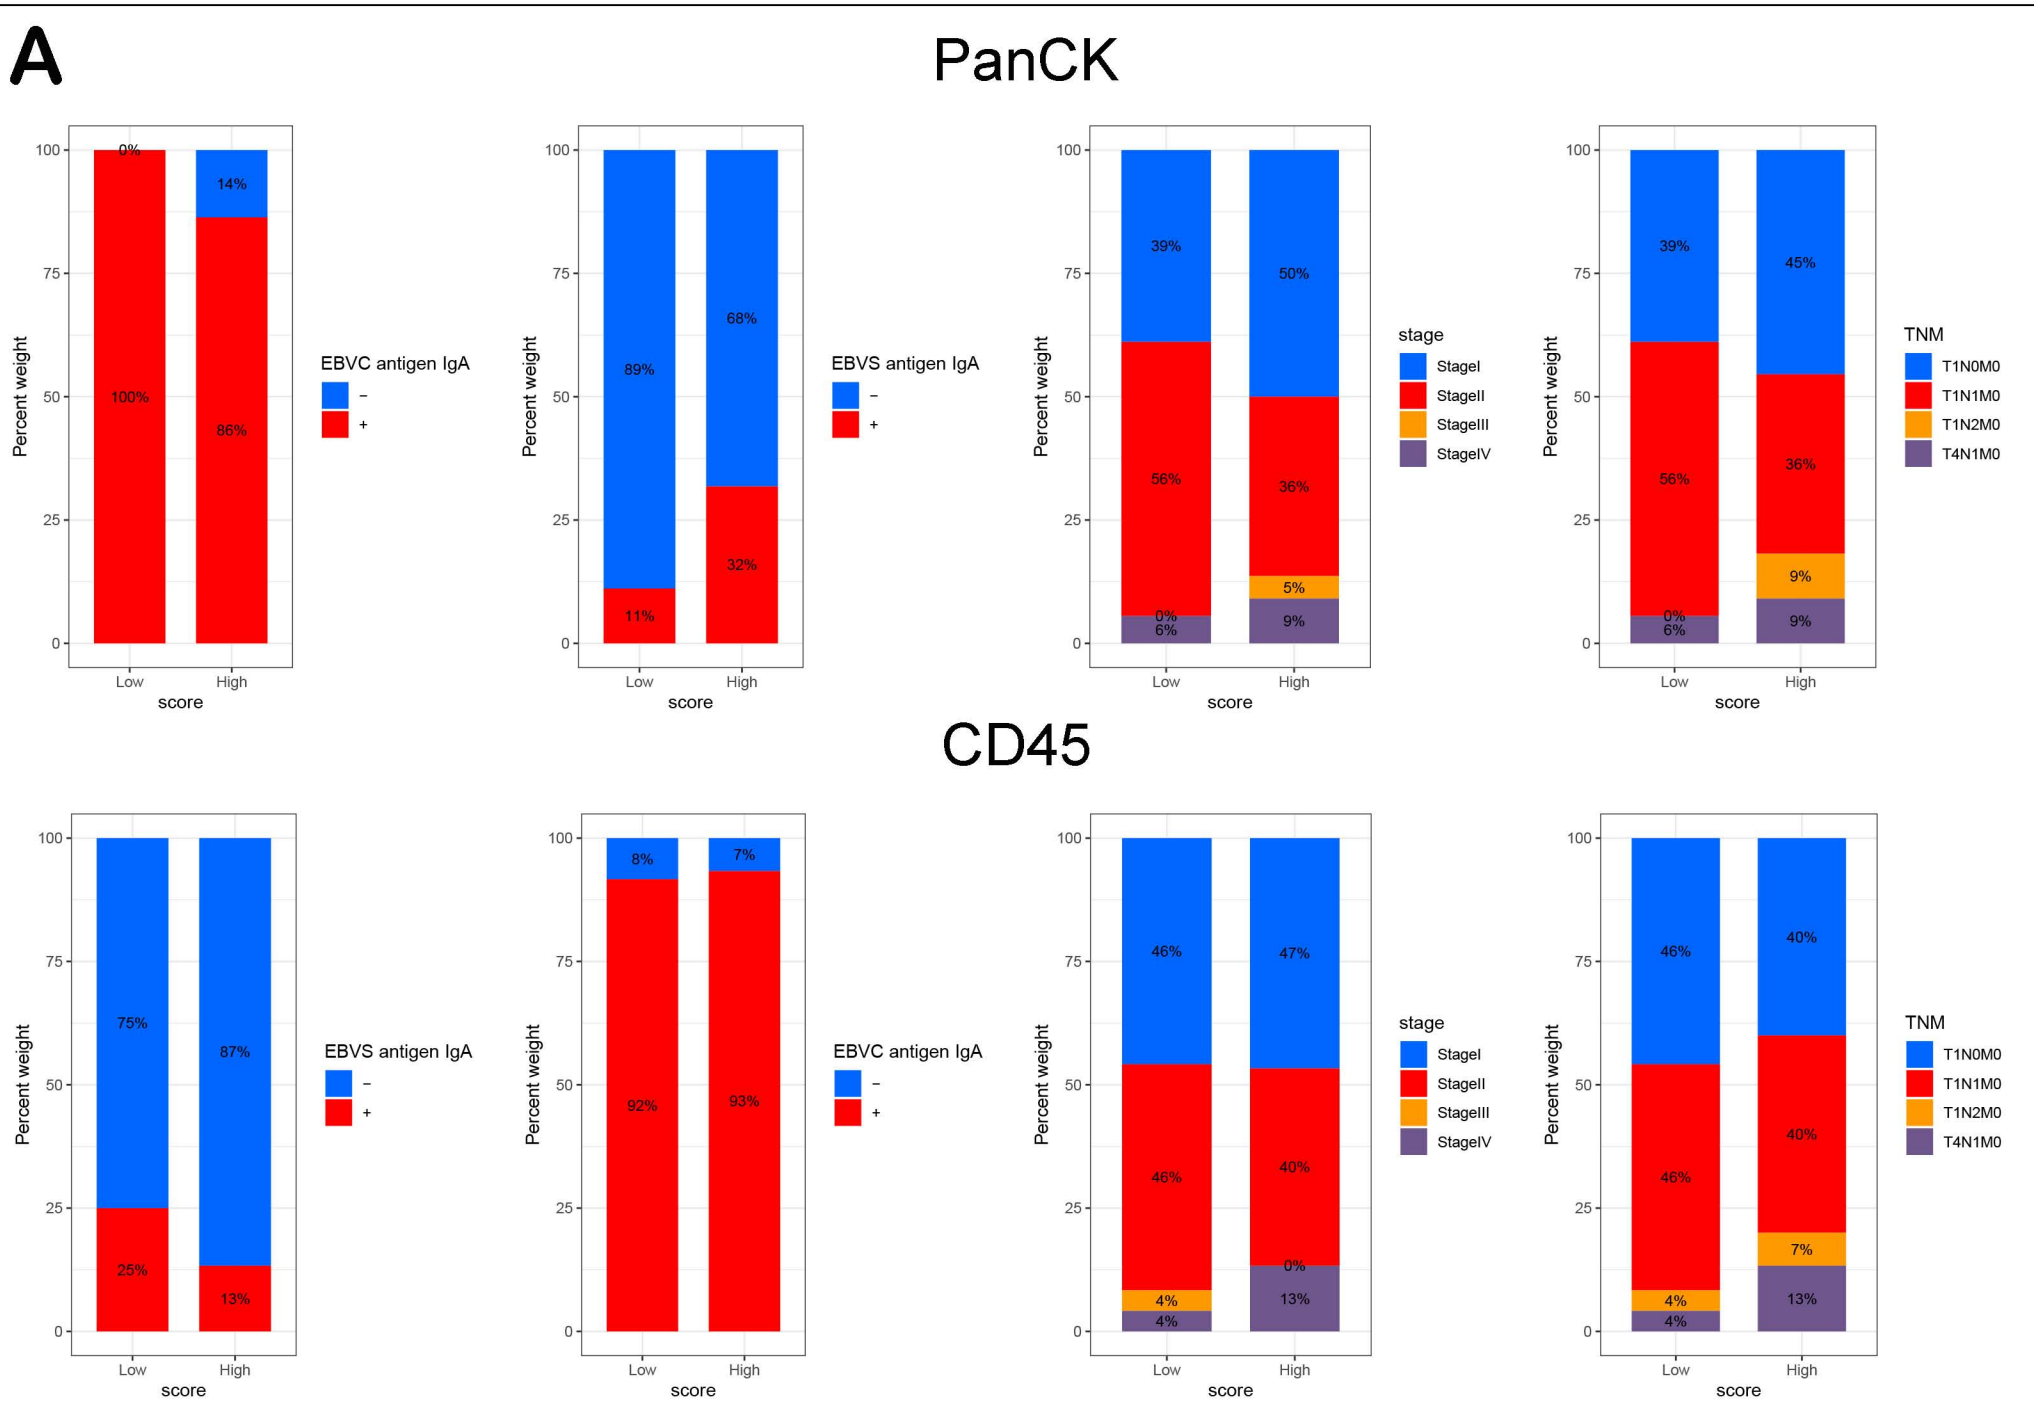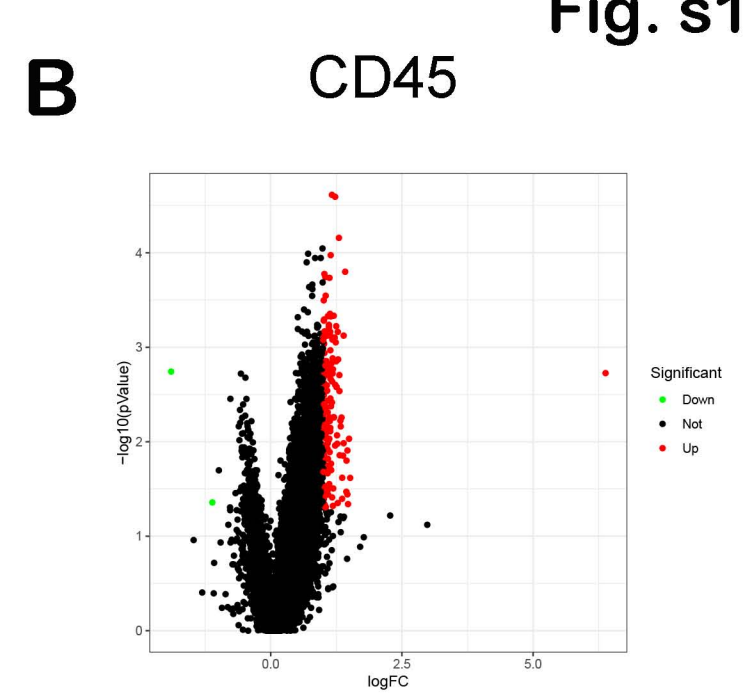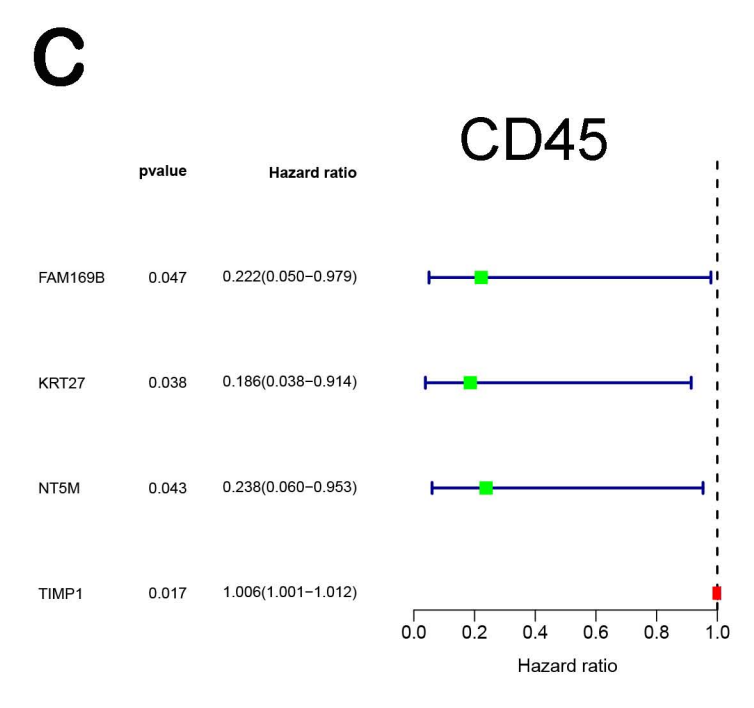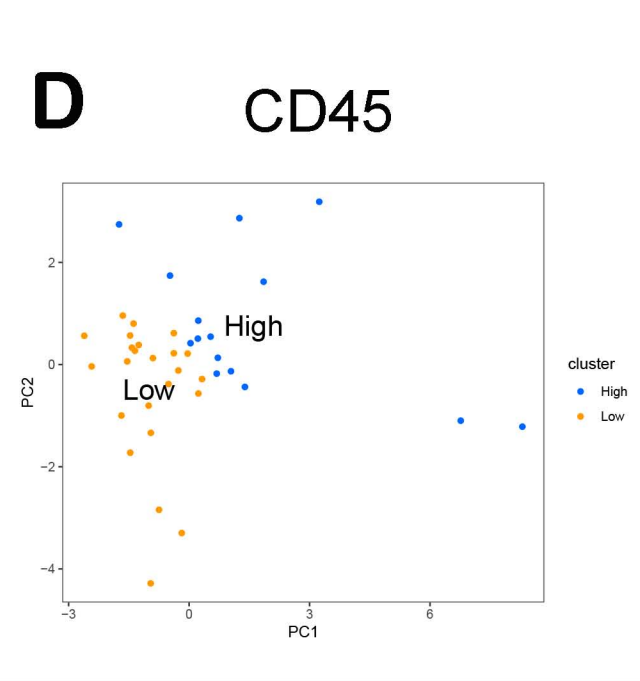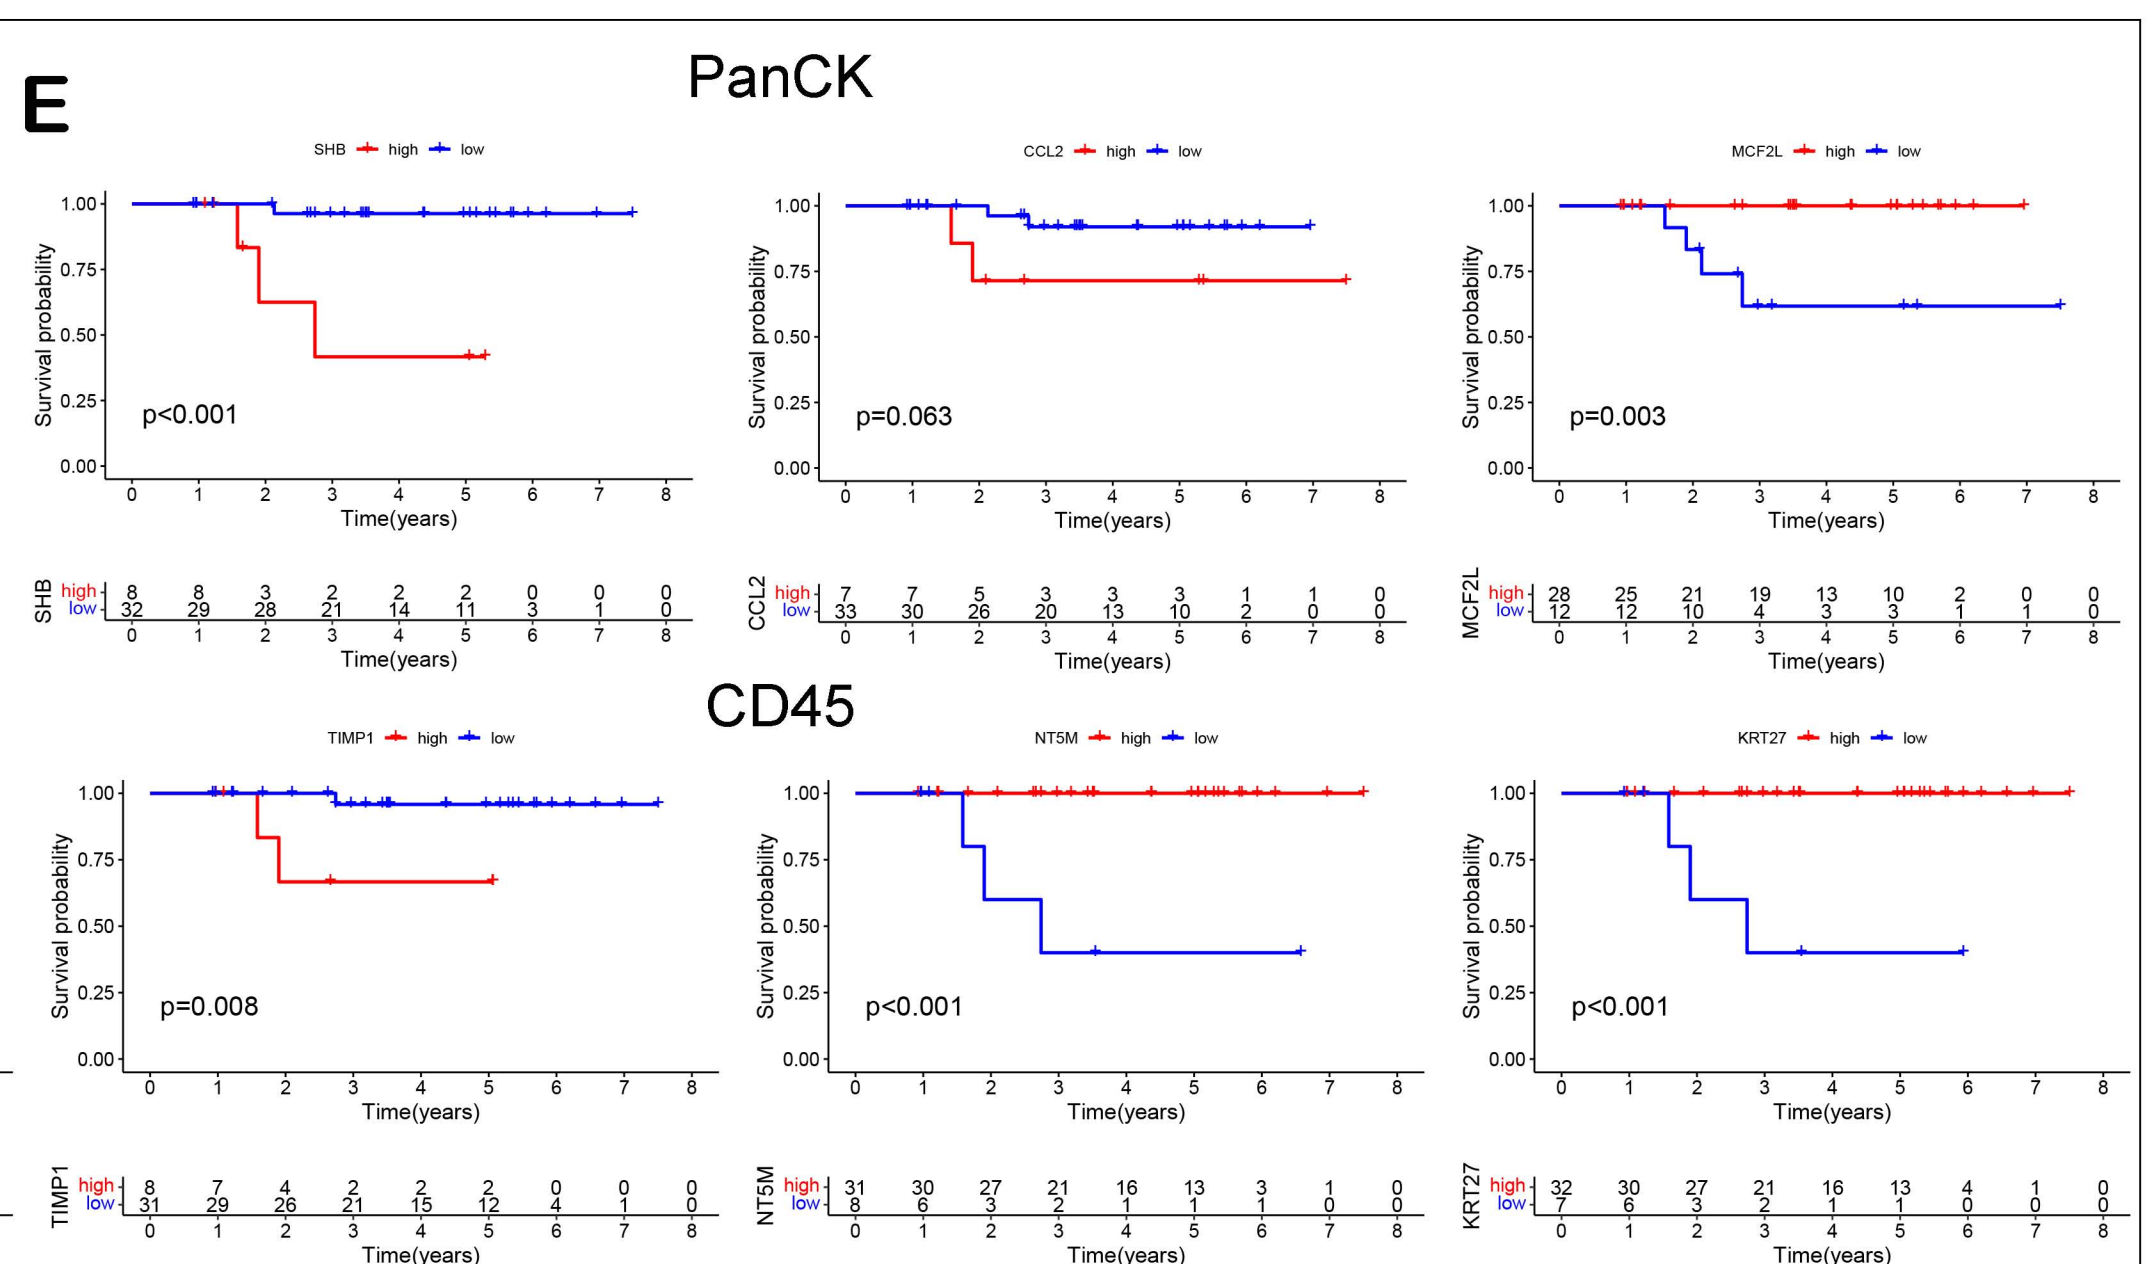

**A**

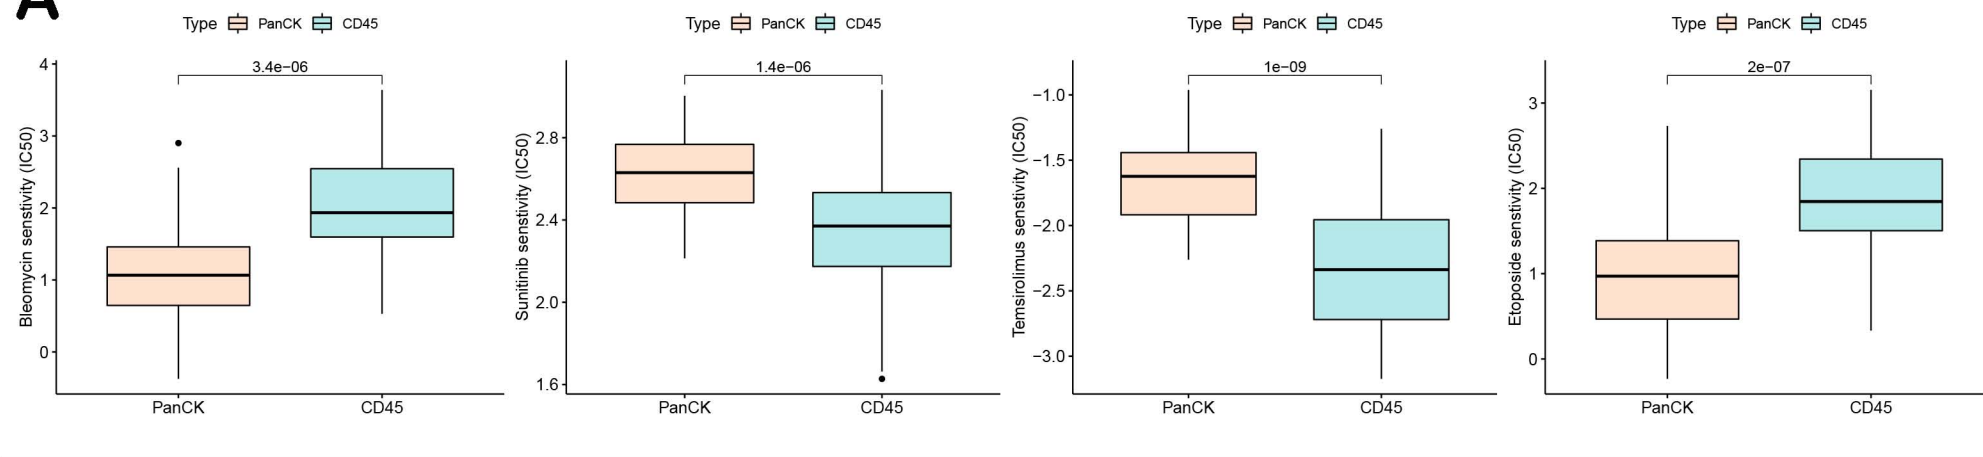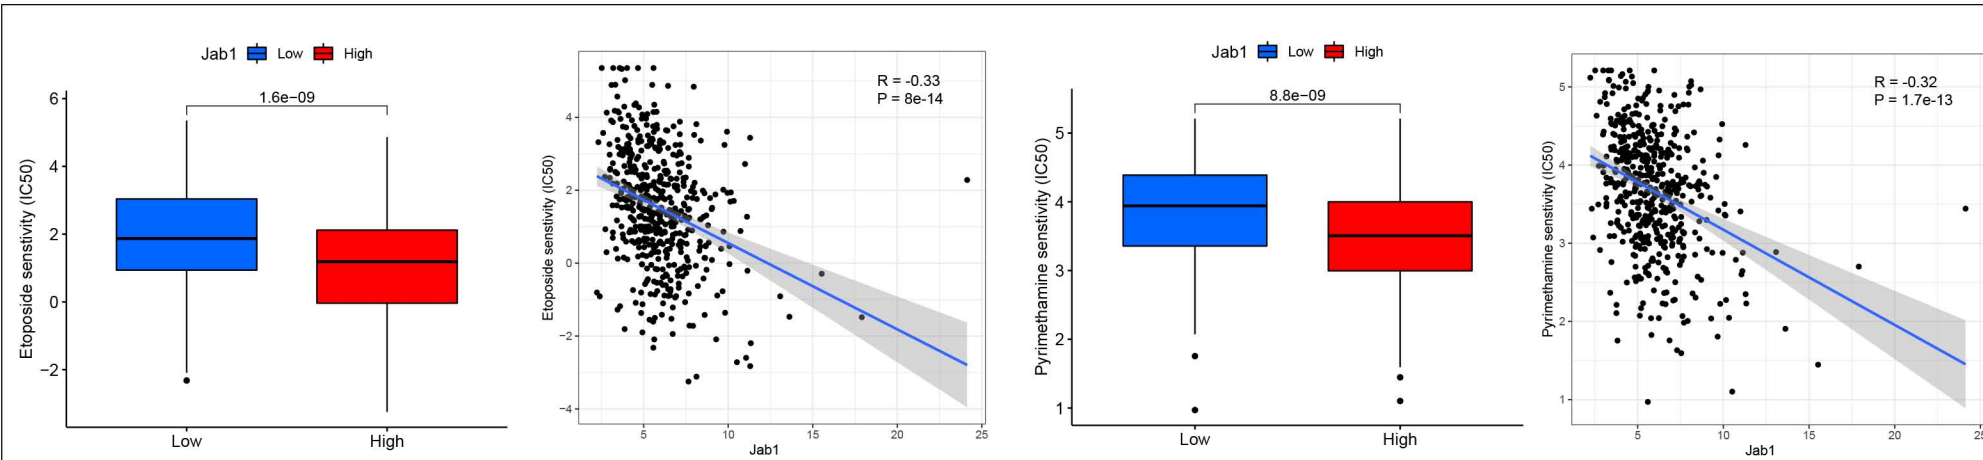

**B**

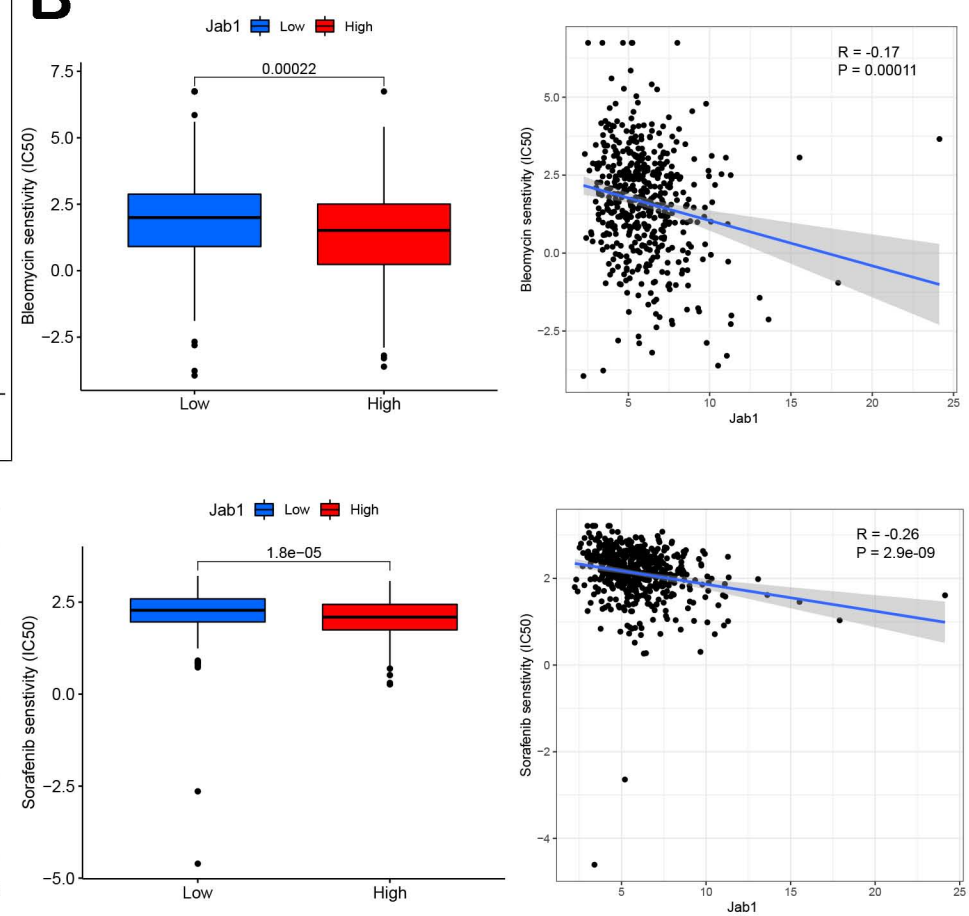

**C**

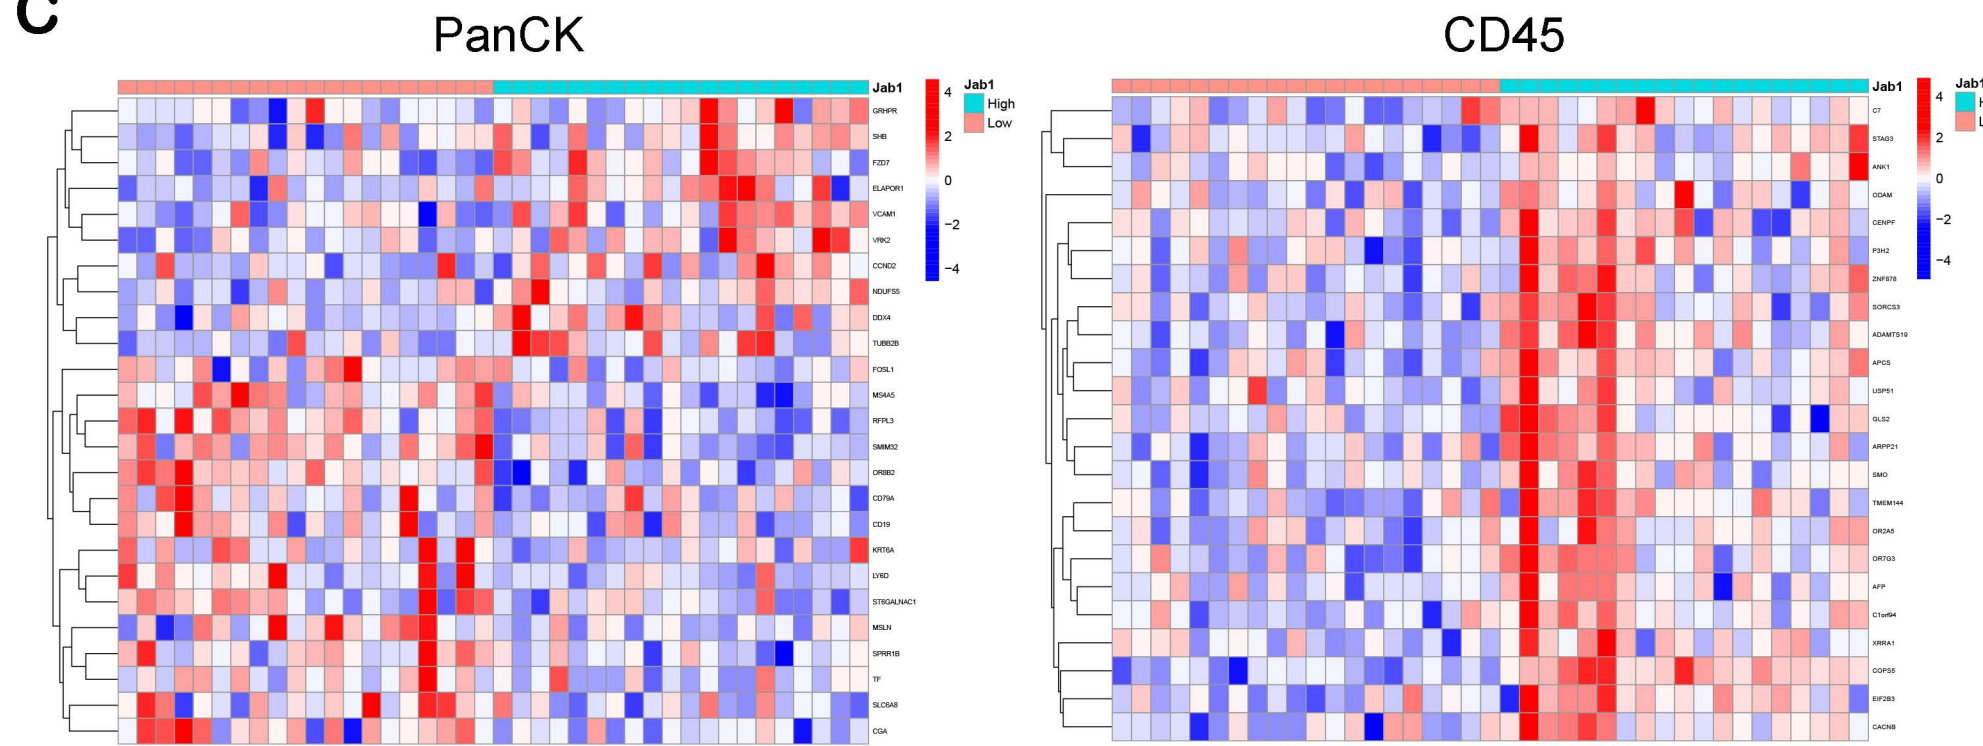

**E**

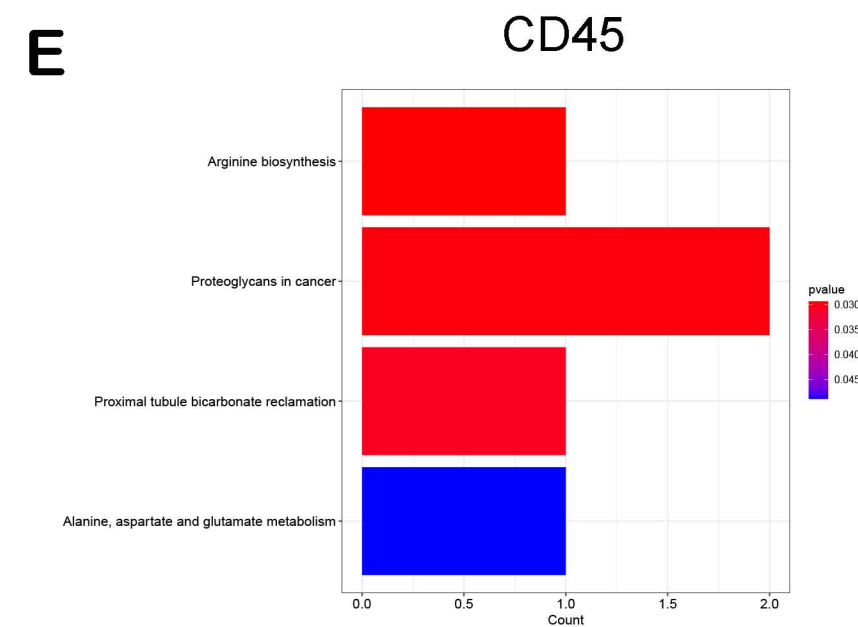

**D**

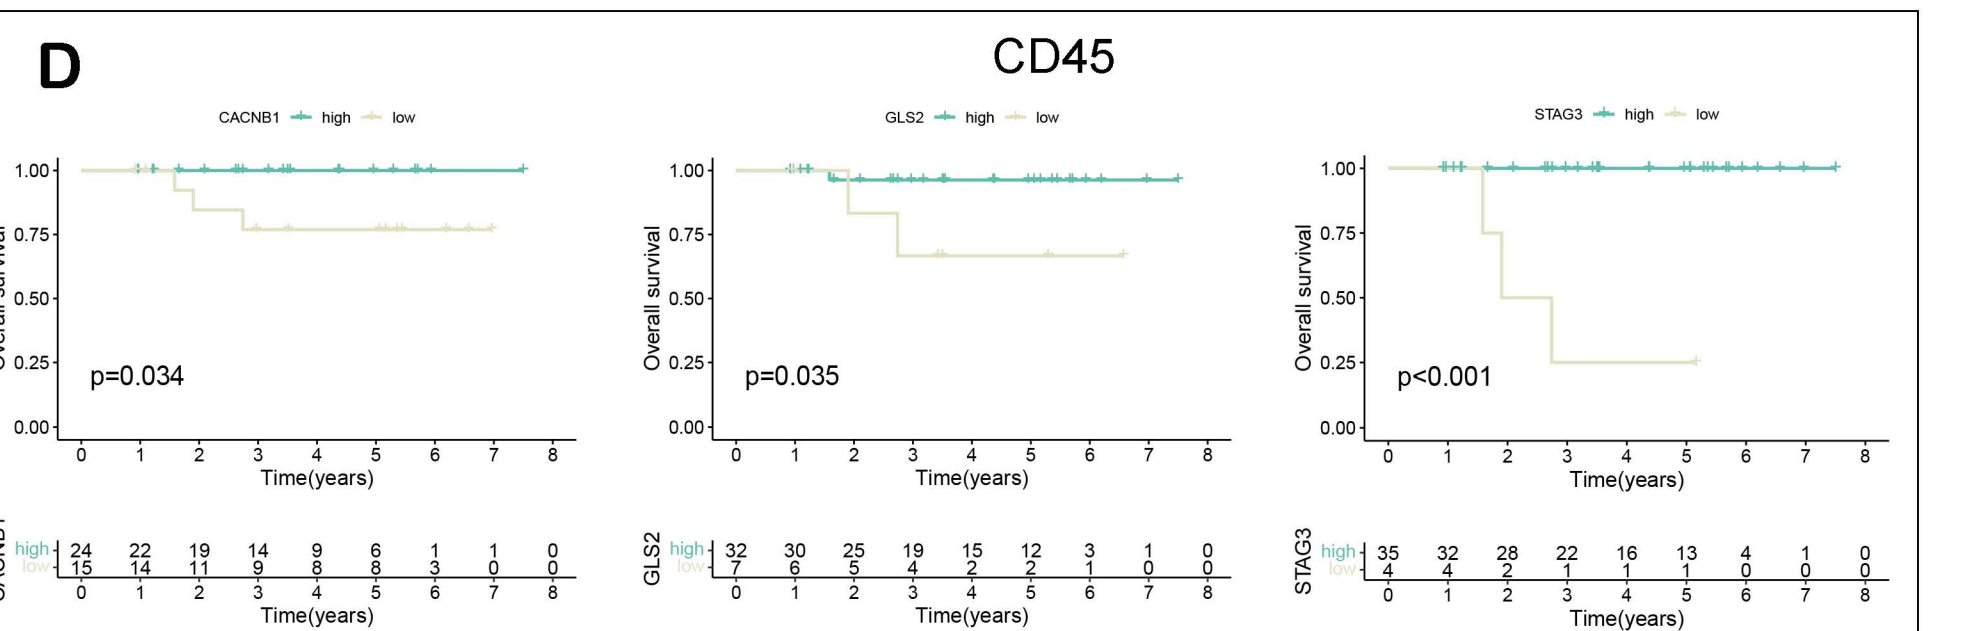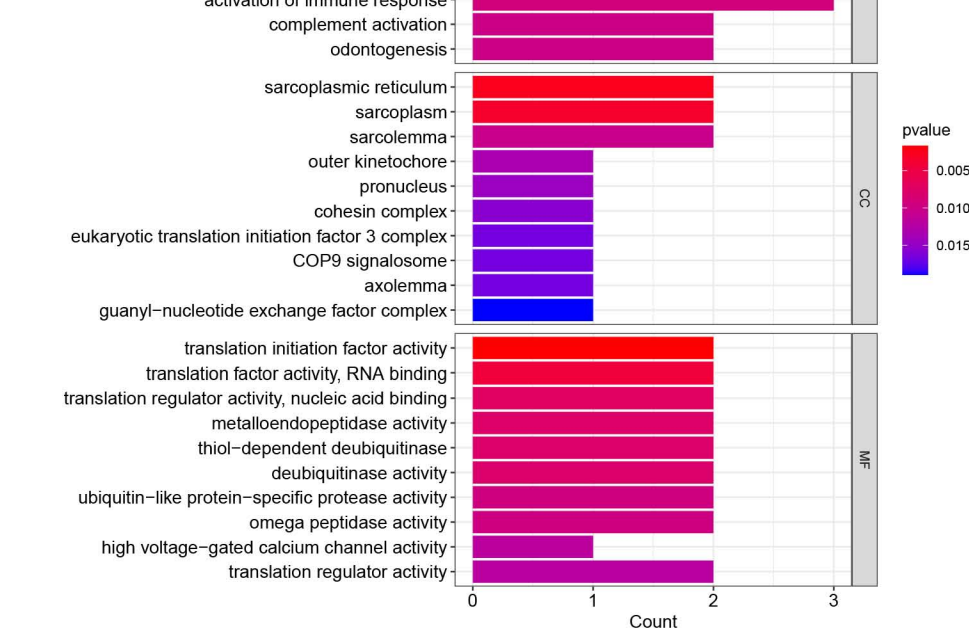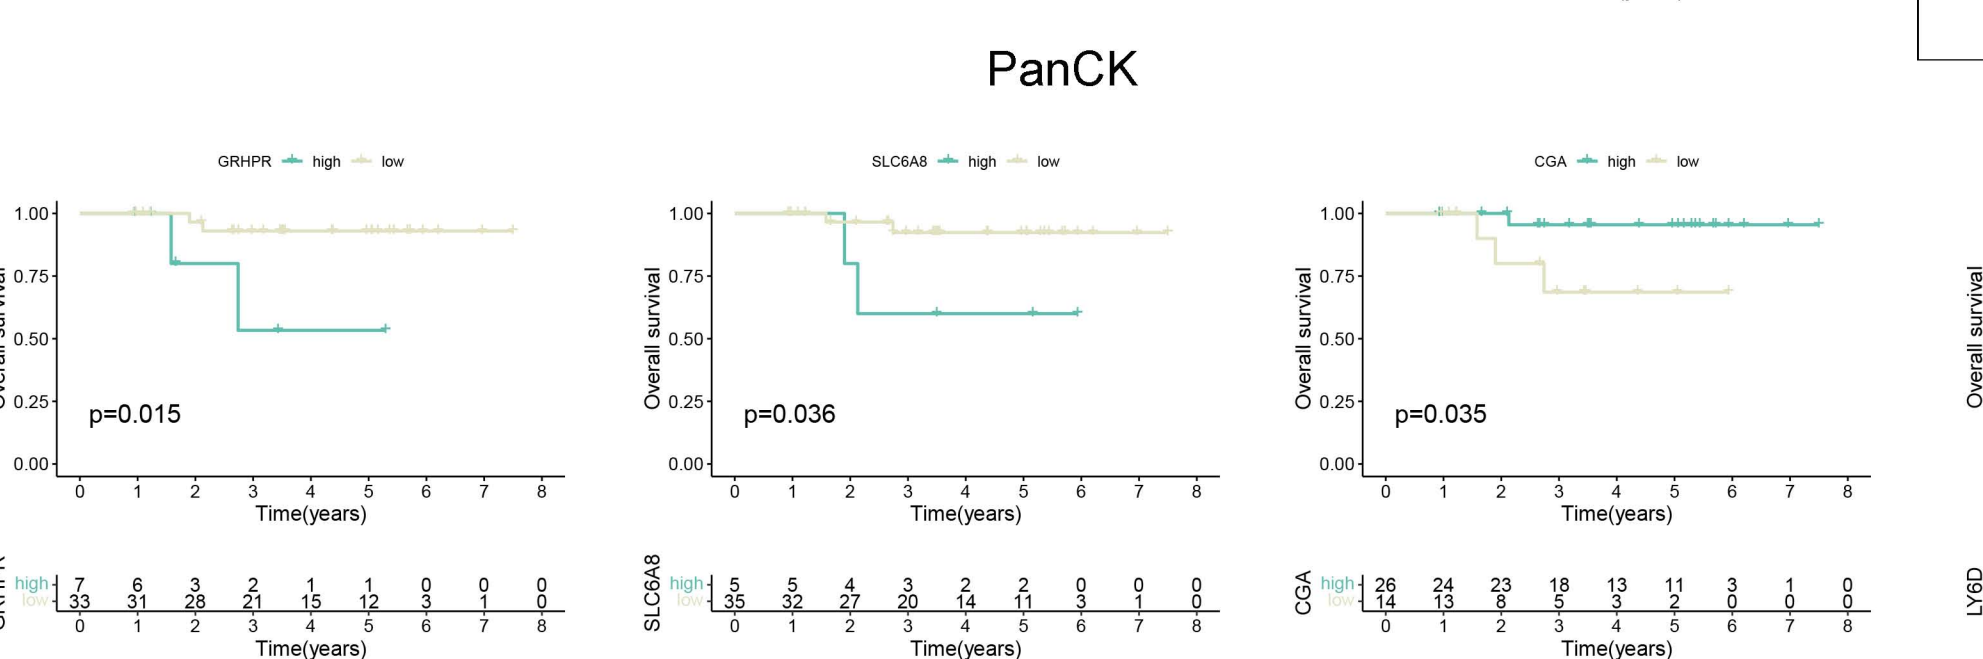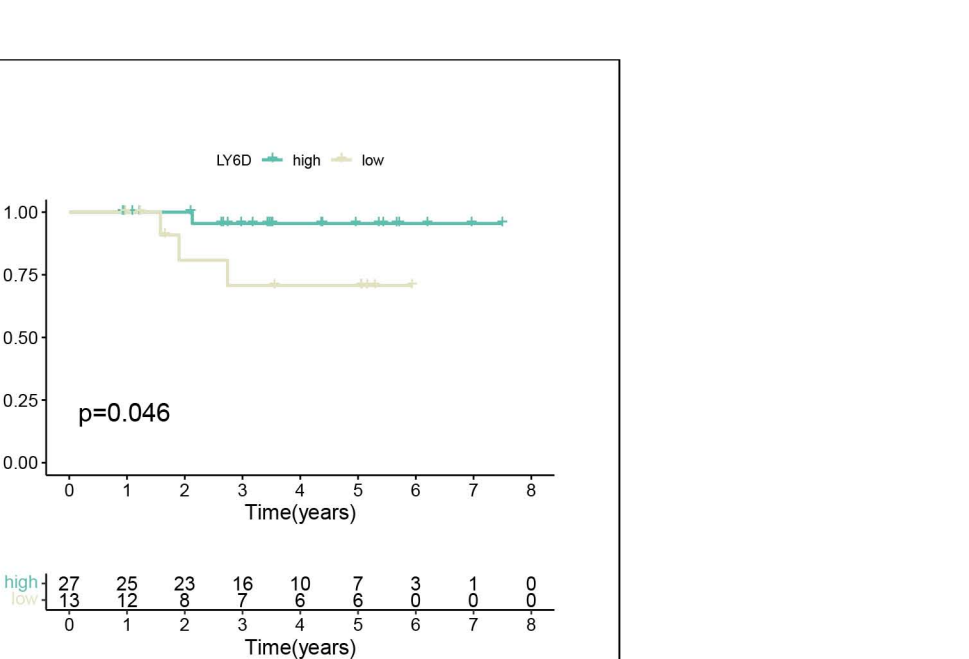

Supplement: DataSheet_1.pdf [file DataSheet_1.pdf]
